# Supplementary material for: Required sampling-density of ground-based soil moisture and brightness temperature observations for calibration/validation of L-band satellite observations based on a virtual reality
Source: Copernicus journal article supplement (doi:10.5194/hess-2019-192), 2019-06-04
Supplement: Supplementary file [file hess-2019-192-RC1-supplement.pdf]

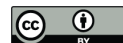

1 Required sampling-density of ground-based soil moisture and brightness  
2 temperature observations for calibration/validation of L-band satellite  
3 observations based on a virtual reality  
4

5 Shaoning Lv<sup>1\*</sup>, Bernd Schalte<sup>1</sup>, Pablo Saavedra Garfias<sup>2</sup>, Clemens Simmer<sup>1</sup>

6 1. Institute for Geosciences and Meteorology at the University of Bonn, Auf dem Huelgel 20, 53121 Bonn,  
7 Germany; 2. Geophysical Institute at the University of Bergen, Allégaten 70, 5020 Bergen, Norway.  
8

9 **Abstract:** Microwave remote sensing is the most promising tool for monitoring global-scale near-surface  
10 soil moisture distributions. With the Soil Moisture and Ocean Salinity (SMOS) and Soil Moisture Active  
11 Passive (SMAP) missions in orbit, considerable efforts are made to evaluate their soil moisture products  
12 via ground observations, forward microwave transfer simulation, and retrievals. Due to the large footprint  
13 of the satellite radiometers of about 40 km in diameter and the spatial heterogeneity of soil moisture,  
14 minimum sampling densities for soil moisture are required to challenge the targeted precision. Here we  
15 use 400 m resolution simulations with the regional terrestrial system model TerrSysMP and its coupling  
16 with the Community Microwave Emission Modelling platform (CMEM) to quantify sampling distance  
17 required for soil moisture and brightness temperature validation. Our analysis suggests that an overall  
18 sampling resolution of better than 6 km is required to validate the targeted accuracy of 0.04 cm<sup>3</sup>/cm<sup>3</sup> (70%  
19 confidence level) in SMOS and SMAP over typical midlatitude European regions. The minimum sampling  
20 resolution depends on the land-surface inhomogeneity and the meteorological situation, which influence  
21 the soil moisture patterns, and ranges from about 7 km to 17 km for a 70% confidence level for a typical  
22 year. At the minimum sampling resolution for a 70% confidence level also the accuracy of footprint-  
23 averaged brightness temperature estimates is equal or better than 15 K/10 K for H/V polarization.  
24 Estimates strongly deteriorate with sparser sampling densities, e.g., at 3/9 km with 3/5 sampling sites the  
25 confidence level of derived footprint estimates can reach about 0.5-0.6 for soil moisture which is much  
26 less than the standard 0.7 requirements for ground measurements. The representativeness of ground-  
27 based soil moisture and brightness temperature observations - and thus their required minimum sampling  
28 densities - are only weakly correlated in space and time. This study provides a basis for a better  
29 understanding of sometimes strong mismatches between derived satellite soil moisture products and  
30 ground-based measurements.

31 **Key words:** passive microwaves, soil moisture, brightness temperature, sampling density  
32  
33

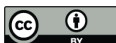

34

## 35 1. Introduction

36 Information on the global soil moisture distribution is required, e.g., for weather forecasting, climate, and  
37 agriculture applications. Due to the high spatial variability of soil moisture, its in-situ observation is  
38 practically impossible on continental scales. Passive microwave satellite remote sensing at L-band  
39 frequencies may achieve this goal because of the strong dependency of the soil dielectric constant on soil  
40 moisture at these wavelengths (Njoku and Kong, 1977; Ulaby et al., 1986). The first operational L-band soil  
41 moisture detection satellite SMOS (Soil Moisture and Ocean Salinity) was launched in 2008 (Kerr et al.,  
42 2010) and followed in 2015 by SMAP (Soil Moisture Active Passive), which additionally carries an active  
43 instrument to achieve higher spatial resolution (Entekhabi et al., 2010); the active component did fail,  
44 however, shortly after the full operation of the satellite. Both satellites are currently continuously  
45 observing passive microwave brightness temperatures from which soil moisture products are derived at  
46 tens of kilometers spatial resolution.

47 Before and after the launch of SMOS and SMAP several soil moisture monitoring networks for  
48 evaluation and retrieval algorithm development were set up, such as ESA's validation efforts at the  
49 Valencia Anchor Station (VAS) in eastern Spain and the upper Danube watershed located in southern  
50 Germany (Delwart et al., 2008; de Rosnay et al., 2006; Lemaitre et al., 2004), and the SMAP Cal/Val project  
51 (Brown et al., 2008; Delwart et al., 2008; Colliander et al., 2017a). According to the Level 1 baseline and  
52 minimum SMAP science requirements (SMAP Science Data Cal/Val Plan (O'Neill et al., 2015)) the spatial  
53 resolution of Level 2 (Passive Soil Moisture Product L2\_SM\_P) and Level 3 (daily composite L3\_SM\_P) soil  
54 moisture products is 36 km with an accuracy of  $0.04 \text{ cm}^3/\text{cm}^3$ . A wide range of measurement techniques  
55 and protocols exist for setting up and performing ground-based observations for evaluation. SMAP Cal/Val  
56 suggests that volumetric soil moisture should be observed in-situ at 5 cm and 100 cm depth while optimal  
57 sensing depths are still debated (Lv et al., 2016a; Lv et al., 2018). For core validation sites, a minimum of  
58 six - better 15 observations - over one SMAP grid cell or footprint is suggested (O'Neill et al.,  
59 2015; Famiglietti et al., 2008), but not substantiated yet by a thorough analysis (Jackson et al., 2012; Crow  
60 et al., 2012). Relevant studies typically use soil moisture networks with fixed resolutions over rather  
61 homogeneous land surfaces, which are not necessarily representative for all land surface types. For SMAP  
62 core calibration/validation sites a 36-km footprint should at least be sampled with eight stations leading  
63 to a 70% confidence for an estimated mean soil moisture uncertainty of  $0.03 \text{ m}^3/\text{m}^3$  given a spatial  
64 variability of  $0.07 \text{ m}^3/\text{m}^3$ . A 9-km footprint should at least be sampled with five stations leading to a 70%  
65 confidence for an estimated mean soil moisture uncertainty of  $0.03 \text{ m}^3/\text{m}^3$ , while a 3-km footprint should  
66 at least be sampled with three stations leading to a 70% confidence for an estimated  $0.05 \text{ m}^3/\text{m}^3$  mean  
67 soil moisture uncertainty in both cases assuming a spatial soil moisture uncertainty of  $0.05 \text{ m}^3/\text{m}^3$  within  
68 the respective footprints.

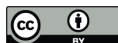

69 Ochsner et al., 2013 point out that too few resources are currently devoted to **in-situ soil moisture**  
70 **monitoring networks**, and that despite their increasing number a standard for network density and  
71 sampling procedures is missing. Coopersmith et al., 2016 suggest temporary network extensions around  
72 permanent installations to quantify the representativeness of the latter. Qin et al., 2013 suggest the use  
73 of MODIS-derived apparent thermal inertia to interpolate between in-situ soil moisture measurements.  
74 So far, the required sampling density is discussed only concerning in-situ measurements, which heavily  
75 depend on sensor quality and network location (Vereecken et al., 2008; Brocca et al., 2010). **No study** is  
76 known to us, which investigates systematically the station density required for the evaluation of derived  
77 soil moisture or brightness temperatures taking the true land heterogeneity into account. In our study,  
78 we use a 400-m resolution virtual reality generated with a terrestrial modeling system coupled with an  
79 observation operator to estimate minimum station densities for the evaluation of L-band satellite  
80 observations and soil moisture retrieval products. This virtual reality allows us to arbitrarily vary the  
81 sampling resolution at steps of 400 m, which is impossible in field campaigns. Section 2 introduces our  
82 model-based virtual reality and the observation operator used to transfer terrestrial system states into  
83 virtual observations. In Section 3 we analyze the error growth with increasing sampling distances in time  
84 and space. Conclusions and discussion are provided in Section 4.

## 85 **2. Methodology and data**

### 86 **2.1 Virtual reality**

87 The modeling system used to create the virtual reality is the Terrestrial Systems Modeling Platform  
88 TerrSysMP (Shrestha et al., 2014; Gasper et al., 2014; Sulis et al., 2015) developed within the framework of  
89 the Transregional Collaborative Research Center 32 (TR32, Simmer, et al. 2015). TerrSysMP consists of the  
90 atmospheric model COSMO (Consortium For Small Scale Modelling, (Baldauf et al., 2011), the land surface  
91 model CLM (Community Land Model Version 3.5, (Oleson et al., 2008)), and the hydrological model  
92 ParFlow v693 (Ashby and Falgout, 1996; Kollet et al., 2010). The platform has especially been designed for  
93 high-performance computing environments (Gasper et al. 2014) and extensively evaluated against  
94 observations (Sulis et al. 2015, 2018; Shrestha et al. 2018b) and similar regional terrestrial system models  
95 (Sulis et al. 2017). The effect of spatial resolution on simulated soil moisture and resulting exchange fluxes  
96 between land and atmosphere has been studied with TerrSysMP by Shrestha et al. (2015, 2018a).

97 The simulated domain in this study is centered on the **Neckar catchment in southwestern Germany**  
98 (Figure 1). Notable features include the upper Rhine valley in the west, the Black Forest mountains in the  
99 southwest, and the foothills of the Alps in the southeast. The landscape has height variations of about  
100 1100 m with lowest elevations found in the Rhine valley and highest in the Black Forest. The topographic  
101 data are obtained from the European Environment Agency EEA (<http://www.eea.europa.eu/data-and-maps/data/eu-dem>), which is also the source for the CORINE land use data  
102 (<http://www.eea.europa.eu/data-and-maps/data/corine-land-cover-2006-raster-3>) used to characterize  
103 vegetation in the model domain. Since CORINE uses many more land use classes than CLM, the CORINE  
104 classes are aggregated to five classes discriminated in the CLM: broadleaf forests which can be found  
105

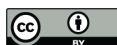

106 mostly in hilly areas throughout the domain in smaller patches, needle leaf forests which dominate at  
107 higher elevation such as the Black Forest, grassland which is relatively rare and only appears in small  
108 patches, and crops which is the most dominant land use type throughout the domain and appears almost  
109 anywhere. All other classes such as urban areas are treated as bare soil in our study.

110 The Leaf Area Index (LAI) for the specific plant classes is taken from MODIS estimates corrected for  
111 known biases (Tian et al., 2004). We have not used the tiling approach in CLM; instead, we used the most  
112 dominant land use type for each grid-cell because the resolution is high enough to warrant this approach.  
113 The SAI is estimated from the LAI by a slightly modified formulation (no dead leaf for crops, constant base  
114 SAI of 10 % of maximum LAI) by (Lawrence and Chase, 2007) and (Zeng et al., 2002).

115 The soil map (Figure 1, upper row) is derived from a product of the German Federal Institute for  
116 Geosciences and Natural Resources BGR ([http://www.bgr.bund.de/DE/Themen/Boden/  
117 Informationsgrundlagen/Bodenkundliche\\_Karten\\_Datenbanken/BUK1000/buek1000\\_node.html](http://www.bgr.bund.de/DE/Themen/Boden/Informationsgrundlagen/Bodenkundliche_Karten_Datenbanken/BUK1000/buek1000_node.html)). Soil  
118 values for regions near the edge of our domain in France and Switzerland were extrapolated. Variability  
119 was added to the relatively large polygons of constant soil parameters following Baroni et al. (2017) to  
120 represent better what would be found in reality at higher resolutions. The soil color was derived from the  
121 carbon content of the soil with carbon-rich soils being darker, except for the bare soil areas, which all use  
122 the same relatively light color class. There is deep soil geology included in ParFlow as well as alluvial  
123 channels below rivers to account for deeper subsurface flow, but these features will not directly impact  
124 the results shown here as they only appear below the soil layers.

125 CLM and ParFlow use the same horizontal computational grid with 400 m resolution. ParFlow has  
126 50 vertical soil layers, the upper 10 of which coincide with the ten soil layers of CLM. The vertical resolution  
127 is variable with smaller steps near the land surface. The atmospheric model COSMO runs at a 1.1 km  
128 horizontal resolution which allows for convection permitting simulations. COSMO is forced at the lateral  
129 boundaries with a COSMO-DE analysis from the operational weather forecast runs from the German  
130 national weather service (Deutscher Wetterdienst, DWD) available at hourly time steps.

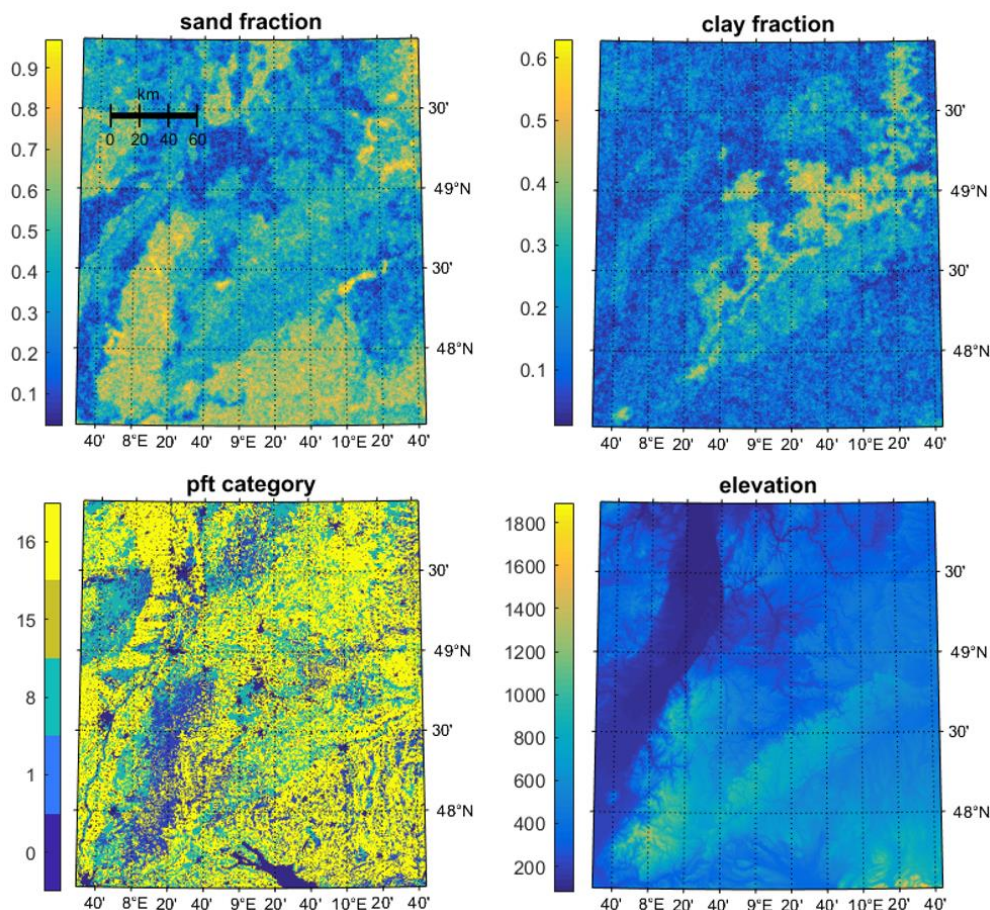

Figure 1: TerrSysMP simulation area at 400 m resolution with the Neckar catchment roughly in the center. Soil sand (left) and clay fractions (right) are displayed in the upper row sub-figures, while the Plant Functional Types (PTFs) used by CLM are shown in the lower left sub-figure (here we use a discrete scale representing the five classes including: 0 bare soil; 1 needle leaf evergreen temperate trees; 8 broadleaf deciduous temperate trees; 15 warm c4 grass; 16 crop) and topography (in m) in the lower right sub-figure.

131

132

## 2.2 Generation of L-Band passive microwave observations

133

134

135

136

137

138

The radiative transfer model CMEM (Rosnay et al., 2009) computes the land emissivity based on a dielectric mixture model for soil moisture, soil sand and clay soil fractions, soil surface roughness, vegetation optical thickness, single scattering albedo, and land surface orientation relative to the satellite viewing perspective. Depending on the sand and clay fractions, brightness temperatures may vary by tens of Kelvins given the same near-surface soil moisture. Vegetation optical thickness depends on LAI, which varies in our virtual reality with time depending on PFT type. Also, soil temperature and snow depth (not

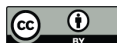

139 shown) impact the simulated brightness temperatures. More details can be found, e.g., in the SMOS global  
140 surface emission model handbook (Rosnay et al., 2009).

141 From the 400 m resolution brightness temperatures, virtual satellite observations are generated  
142 taking the satellite antenna function into account. Figure 2 shows the centers of the about 320 footprints  
143 covering the model area for one potential satellite overpass and - on the same scale - the satellite antenna  
144 function for one footprint, which will change somewhat in shape with the elevation of the individual 400  
145 m model grid areas, orbit, and satellite viewing angle.

146 Not each SMOS overflight will cover the whole area in reality. But in our study, we assume for  
147 simplicity, that all footprints indicated in Figure 2 are observed once a day at 6 a.m., which corresponds  
148 to the approximate descending or ascending overpass time of SMOS and SMAP, respectively. The satellite  
149 footprint is much larger than the nominal satellite spatial resolution of 40 km; thus areas much larger in  
150 diameter contribute to one satellite-observed brightness temperature (i.e., 50% of one satellite-observed  
151 brightness temperature originates from an area roughly ten times larger than the nominal satellite  
152 footprint).

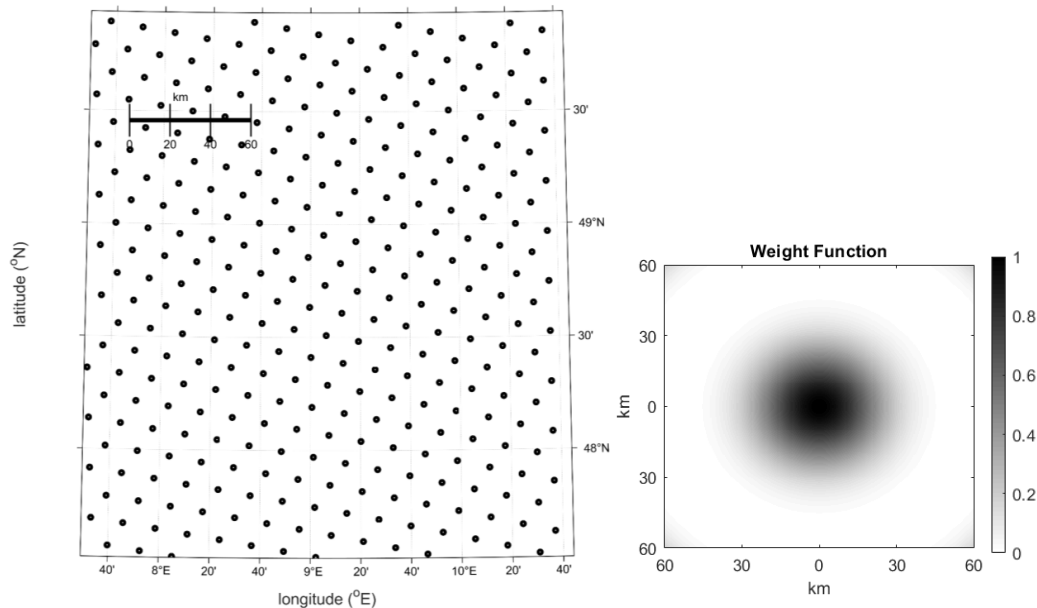

Figure 2: Dots in the left sub-figure indicate the centers of SMOS footprints for one hypothetical satellite overpass. The right sub-figure shows the antenna pattern in dB of one satellite footprint on the same scale as the map on the left.

153

154 The virtual reality employed in this study is a physically consistent state of the terrestrial system in  
155 space and time because it has been produced by a numerical model based on the conservations equations





156 for mass, energy, and momentum. When applying the observation operator CMEM to this model state,  
 157 we assume that the model state is correct and the simulated microwave transfer is error-free. Thus, our  
 158 sampling study only quantifies the impact of the sampling density but does not include errors of the  
 159 dynamic model (TerrSysMP) and/or the forward operator (CMEM). Based on the modeling results we  
 160 analyze a range of ground-based network configurations with sampling points at least 400 m apart, and  
 161 we assume that all quantities (state of the terrestrial system and brightness temperature) do not vary  
 162 within 400 m. While this is an approximation, we believe that our results can be generalized, except that  
 163 their outcome might be too optimistic.

164 With the model area covering one SMOS/SMAP footprint containing approximately 106x106 grid  
 165 columns, that area could be sampled by one up to a maximum of 106x106 (virtual) sites. If the foot-print  
 166 area is sampled with  $n$  sites, there are  $C_{106 \times 106}^n$  sampling combinations (SC, hereafter) possible, with

$$167 \quad SC = C_{106 \times 106}^n = \frac{106!}{n! \times (106 - n)!} \quad (1)$$

168 which is an unordered collection of distinct elements of a prescribed size taken from a given set. For  
 169 example, with an average distance between sampling sites of 10 km, about 6x6 sampling sites are possible  
 170 within one footprint, which can be spatially distributed in  $C_{106 \times 106}^{6 \times 6} \approx 1.69 \times 10^{104}$  ways. It is computationally  
 171 not feasible to consider all those combinations. When we divide, however, first each footprint into  
 172 equally-sized sub-areas, each containing exactly one sampling site (this assumes a certain homogeneity  
 173 within the network), the number of potential sampling networks is drastically reduced. If we set, e.g., the  
 174 average sampling distance of a 43-km wide footprint to  $i$  km, we divide the footprint into  $\left(\frac{43}{i}\right)^2$   
 175 each containing  $106 \times 106 / \left(\frac{43}{i}\right)^2 \approx 6.08 \times i^2$  400m-resolution model columns. When we further select  
 176 within each sub-area of a satellite footprint the same model column (i.e., the one with row number  $k$  and  
 177 column number  $l$ ), a regular equidistant observation network within the SMOS/SMAP footprints is  
 178 enforced similar to, e.g., the study by (Famiglietti et al., 2008). For each footprint (subscript f) at a  
 179 particular time (subscript t) of a certain sampling distance ( $i$  km, subscript d),  $SC_{fd}$  for soil moisture is

$$180 \quad SC_{fd} = \left(\frac{i}{0.4}\right)^2 \approx 106 \times 106 / \left(\frac{43}{i}\right)^2 \quad (2)$$

181 This results for a certain sampling distance ( $i$  km) for all 320 footprints and all 365 days of a year to

$$182 \quad SC_{ft} = \left[106 \times 106 / \left(\frac{43}{i}\right)^2\right] \times 365 \times 320 . \quad (3)$$

183 For each day given two observations for all 320 footprints, we get



184 
$$SC_{td} = \sum_{i=0.8,1.2,\dots}^{18} \left[ 106 \times 106 / \left( \frac{43}{i} \right)^2 \right] \times 320, \quad (4)$$

185 and for each satellite footprint with two observations per day taken over one year

186 
$$SC_{fd} = \sum_{i=0.8,1.2,\dots}^{18} \left[ 106 \times 106 / \left( \frac{43}{i} \right)^2 \right] \times 365 \quad (5)$$

187 samples, from which we determine the one with the maximum sampling error. E.g., for 800 m sampling  
188 distance we determine the maximum from  $\left( \frac{0.8}{0.4} \right)^2 \times 365 \times 320 = 467200$  samples, the number of which  
189 increases with the square of the sampling distance. This sampling is applied to both soil moisture and  
190 brightness temperature with and without considering the satellite weighting function (Figure 2b). The  
191 confidence level required by SMAP Cal/Val in core-sites is 70%. Thus, instead of the maximum error, we  
192 take the error at the 70 percentile, if not specified otherwise.

### 193 3. Results

194 We first discuss in detail the results for soil moisture sampling. Then we extend the same methodology to  
195 brightness temperature and compare both results. We also evaluate the potential sampling error for 3 km  
196 and 9 km satellite footprint sizes, because the SMAP products also include combined active-passive soil  
197 moisture retrievals at higher spatial resolutions (e.g., EASE-grid 9 km) and a product only based on the  
198 active sensor (EASE-grid 3 km).

#### 199 3.1 Soil moisture

200 We compare the true (virtual) spatial arithmetic average of soil moisture at the SMOS/SMAP resolution  
201 with the arithmetic average of soil moisture computed from the sampling points taken at average  
202 distances ranging from 400 m (i.e., each TerrSysMP grid column, no sampling error) to 18 km (about half  
203 the radius of a SMAP or SMOS pixel. By Equation (3), (4), and (5), we analyze the sampling distance in the  
204 terms of Probability density function (Figure 3 and 6, based on  $SC_{ft}$ ), along time dimension (Figure 4 and  
205 7, based on  $SC_{td}$ ) and along spatial dimension (Figure 5 and 8, based on  $SC_{fd}$ ). When we later compare  
206 brightness temperatures we use averages weighted by the antenna function; using that strategy also for  
207 soil moisture leads to differences below  $0.01 \text{ cm}^3/\text{cm}^3$ ; thus the averaging procedure does not impact our  
208 conclusions for soil moisture.

209 For each average sampling distance, we compute for each footprint the maximum sampling error  
210 obtained from the twice-daily observations over one year of all network configurations. The distribution  
211 of the corresponding 320 values is displayed in Figure 3 (top). Thus each value entering the distribution at  
212 a given average sampling distance (individual box plot in Figure 3) stems from that sampling network for  
213 one of the 320 SMOS/SMAP footprints, which leads to the largest sampling error taking all twice-daily





214 observations over a year into account (Equation (3)). With a sampling distance of 400m, we exactly  
215 reproduce the true (virtual) arithmetic soil moisture average, i.e., the maximum error is zero. Maximum  
216 errors increase with sampling distance as demonstrated by the widening of the maximum error  
217 distribution. The median of the maximum sampling error increases about linearly with about 0.022  
218  $\text{cm}^3/\text{cm}^3$  per kilometer sampling distance. The spread of the maximum error increases from less than 0.01  
219  $\text{cm}^3/\text{cm}^3$  at 0.8 km to 0.4  $\text{cm}^3/\text{cm}^3$  at 18 km with quite some variability between the sampling steps. To  
220 guarantee an absolute error below 0.04  $\text{cm}^3/\text{cm}^3$  (the assumed accuracy of SMOS/SMAP retrievals), which  
221 with 100% confidence everywhere in the region at any time of the year, the maximum average sampling  
222 distance should not exceed 2.8 km. At an average sampling distance of 4.8 km, for 50% of the SMOS/SMAP  
223 pixels sampling networks exist, which would lead to the occurrence of sampling errors above 0.04  $\text{cm}^3/\text{cm}^3$   
224 at least once per year. At an average sampling distance of 4.4 km (less than 18 sites within a 43 km x 43  
225 km pixel), the same would hold for more than 75% of the SMOS pixels. We note here that the size of the  
226 average footprints of the SMAP passive soil moisture product is 36 km x 36 km per pixel which is somewhat  
227 less than for SMOS.

228 For SMAP CAL/VAL core validation sites the target accuracy should be reached with a confidence  
229 level of only 70%. Figure 3 (bottom) displays the distribution of the 70 percentile of the error at each  
230 satellite pixel instead of the maximum error (100 percentile) shown in Figure 3 (top). Thus, to guarantee  
231 an error below 0.04  $\text{cm}^3/\text{cm}^3$  for all network configurations for only up to 70% of all SMOS/SMAP pixels  
232 and all days of the year, a minimum sampling distance of 6 km is required. At an average sampling distance  
233 of 12 km, only 50% of the pixels fulfill this requirement. Overall, about one-quarter of the nominal stations  
234 are needed, when the requirement to stay within the 0.04  $\text{cm}^3/\text{cm}^3$  error margin is relaxed from 100%  
235 confidence level to 70%.

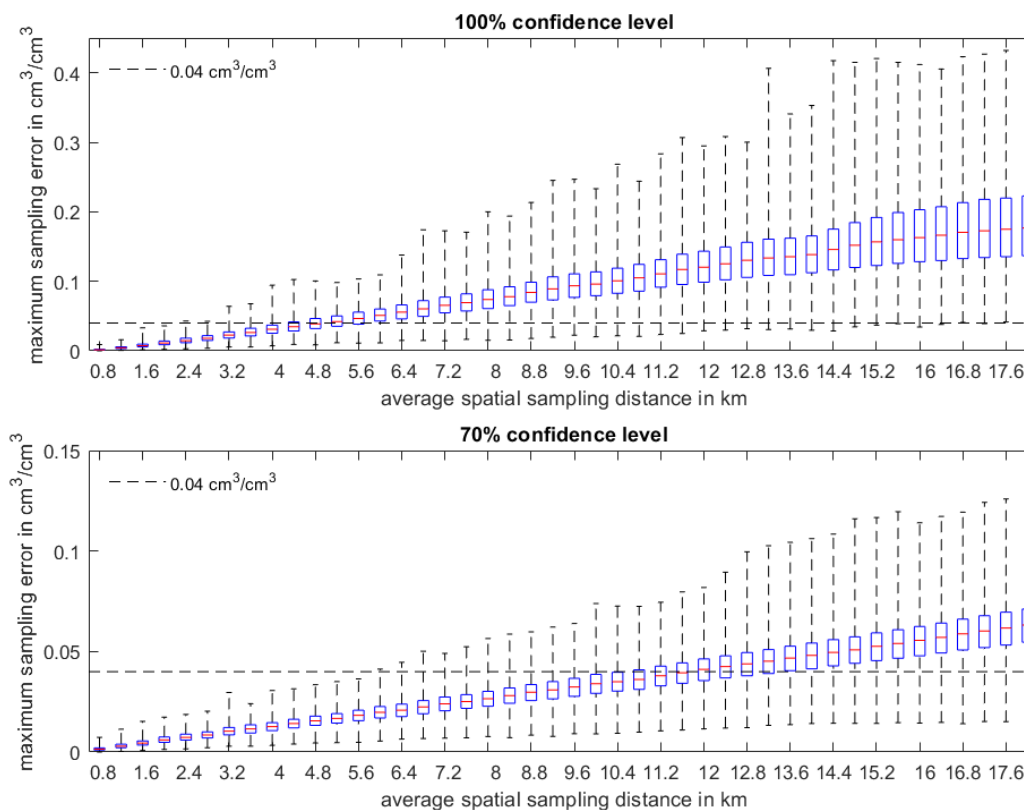

Figure 3: Box-whisker-plots (median in red, 25- and 75-percentiles as bounds of the box, whiskers encompass all values) of the maximum sampling errors for the 320 satellite footprints of the arithmetic mean soil moisture estimated for all network configurations observing twice-a-day over one year at given average sampling distances (abscissa). The top subfigure shows the absolute maximum error, while the bottom subfigure displays the results for the 70<sup>th</sup> percentile of the error at each satellite footprint. The horizontal dashed line is the 0.04 cm<sup>3</sup>/cm<sup>3</sup> retrieval error anticipated for SMOS and SMAP.

236

237 From the simulations, we can also quantify the required maximum sampling distance for each daily  
238 observation of the whole area, and for each of the 320 SMOS/SMAP footprints over time by the samples  
239 defined in Equation (4). According to Figure 4, for 80 percent of the SMOS/SMAP pixels, the maximum  
240 sampling distance is between 8.4 km and 16 km, which is 7 - 26 stations for SMOS (43 km) and 5 - 18  
241 stations for SMAP passive (36 km) to reach the 70% confidence level. A seasonal variation is not obvious,  
242 but rainfall events affect the distributions by increasing the maximum sampling distances because the  
243 surface soil moisture becomes more homogeneously distributed in space. The opposite occurs during  
244 drought events, because of evaporation, draining, and runoff tends to create spatially inhomogeneous  
245 soil moisture distributions.

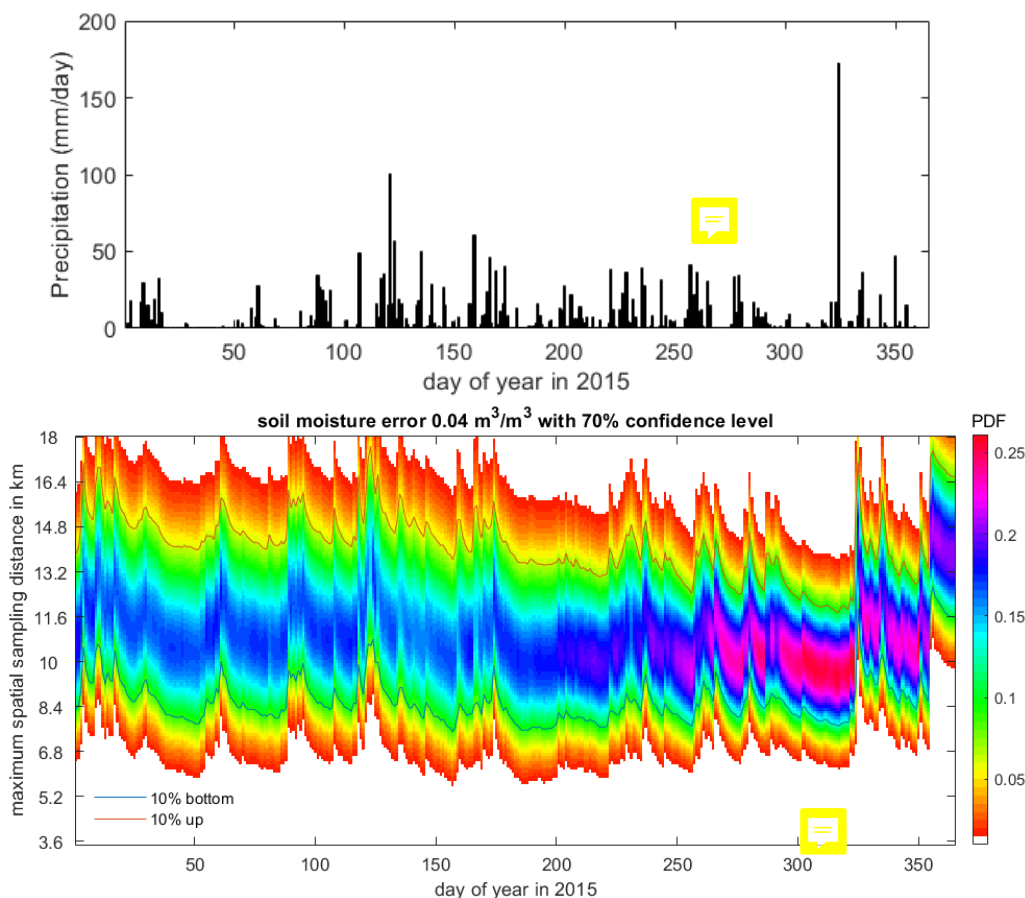

Figure 4: Time series of the distribution of the maximum soil moisture sampling distance for each SMOS/SMAP pixel required to assure a sampling error below  $0.04 \text{ cm}^3/\text{cm}^3$  (70% confidence) for the year 2015. The grey intensity is proportional to the probability of occurrence. Also the median and the 5 and 95-percentiles are indicated as lines.

246

247 The spatial distribution of the annual average maximum sampling distance required to guarantee a  
248 sampling error below  $0.04 \text{ cm}^3/\text{cm}^3$  (70% confidence) and its RMS for the year 2015 (Figure 5) indicates,  
249 that the southeastern region requires on average sampling distances of up to 16 km; thus only nine sites  
250 are required within a SMOS/SMAP pixel to estimate the footprint-averaged soil moisture with a sampling  
251 error below  $0.04 \text{ cm}^3/\text{cm}^3$ . However, the annual variation is particularly small (blue). For the rest of the  
252 region, maximum sampling distances range from 7 km to 10 km; thus, many more than nine sites are  
253 required within one footprint. The annual variation of the maximum sampling distances for those  
254 footprints is larger than in the southeast. The mean sampling distances and their day-to-day variations  
255 are only weakly correlated (correlation coefficient 0.40), but show larger-scale common patterns.

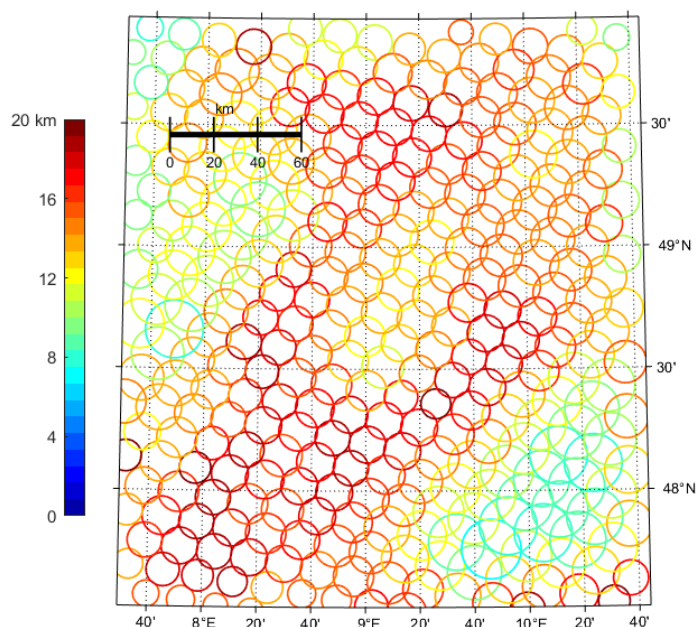

Figure 5: Spatial distribution of the mean soil moisture sampling distance in the model area required for keeping the maximum sampling error below  $0.04 \text{ m}^3/\text{m}^3$  over the whole year. The circle diameter indicates the maximum sampling distance in the scale shown in the map, while its color (see color bar) gives the RMS of the maximum sampling distance over time for the year 2015.

256

### 257 **3.2 brightness temperature**

258 We now determine the maximum sampling distances of ground-based microwave radiometers observing  
259 the land surface required to estimate SMOS/SMAP footprint brightness temperatures. To this goal, we  
260 transform the target accuracy of SMOS/SMAP soil moisture retrievals of  $0.04 \text{ cm}^3/\text{cm}^3$  to the accuracy of  
261 the corresponding brightness temperature, which is 10 K for H polarization and 5 K for V polarization  
262 according to CMEM forward **simulations**. We note that this brightness temperature accuracy is not the  
263 instrument observing error of the (virtual) microwave radiometer, but the sensitivity of the microwave  
264 forward transfer model to soil moisture. We are aware, that the radiometric accuracies of ground-based  
265 and satellite-borne sensors are much better, and that the accuracy of the soil moisture-brightness  
266 temperature relation is mainly responsible for the retrieval accuracy; thus we use the 10K/5K uncertainty  
267 only as a proxy for the overall error.

268 According to Figure 6 already at a sampling distance of 800 m, the sampling error might exceed the 10K/5K  
269 limit at certain regions and times. If we want to keep the limit with a probability of 90% (the upper  
270 boundary of boxes in Figure 6 H/V 100% confidence panels), a maximum sampling distance below 4.4  
271 km/4 km will confine the sampling error to below 10 K/5 K for H/V polarization brightness temperatures.



272 For an average sampling distance of 5.2 km, the error may go beyond the nominal 10 K/5 K for both  
273 polarizations already with a probability of 50%, and already for 9.2 km average sampling distance, the  
274 maximum sampling error is always above the nominal values for some region and a day in the year. Even  
275 if we relax the nominal error to only 70% of all pixels and days, the requirement cannot be met already at  
276 800 m average sampling distance, while the average sampling distance required to fulfill the nominal  
277 accuracy for only 50% of all networks moves from 5.2 to 10 km.

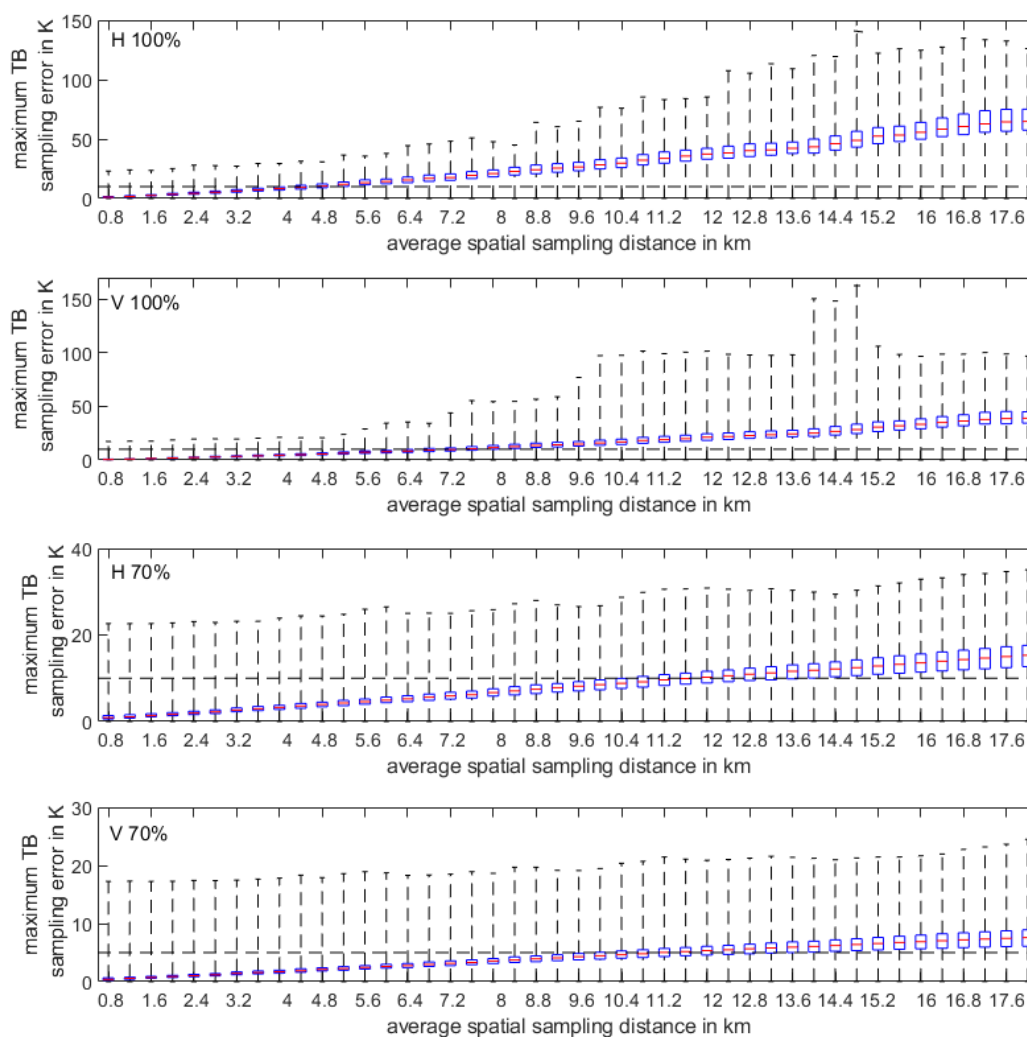

Figure 6: Same as Figure 3 but for the sampling error of the brightness temperature. The respective brightness temperature errors equivalent to a soil moisture accuracy of  $0.04 \text{ cm}^3/\text{cm}^3$  of 10 K for H polarization and 5 K for V polarization are indicated as dashed horizontal lines.

278



279 The time series of the distribution of the maximum sampling distances for brightness temperature  
280 (Figure 7) is quite similar to the one for the maximum sampling distances for soil moisture. Values range  
281 from 6.8 km to 16.4 km for most cases. The spread of the sampling error has, however, a distinct seasonal  
282 variation; e.g., the maximum sampling distance for 90% of the sampling configurations is 11.6 km from  
283 DOY 100 to 275 and 8.8 km for the rest of the year.

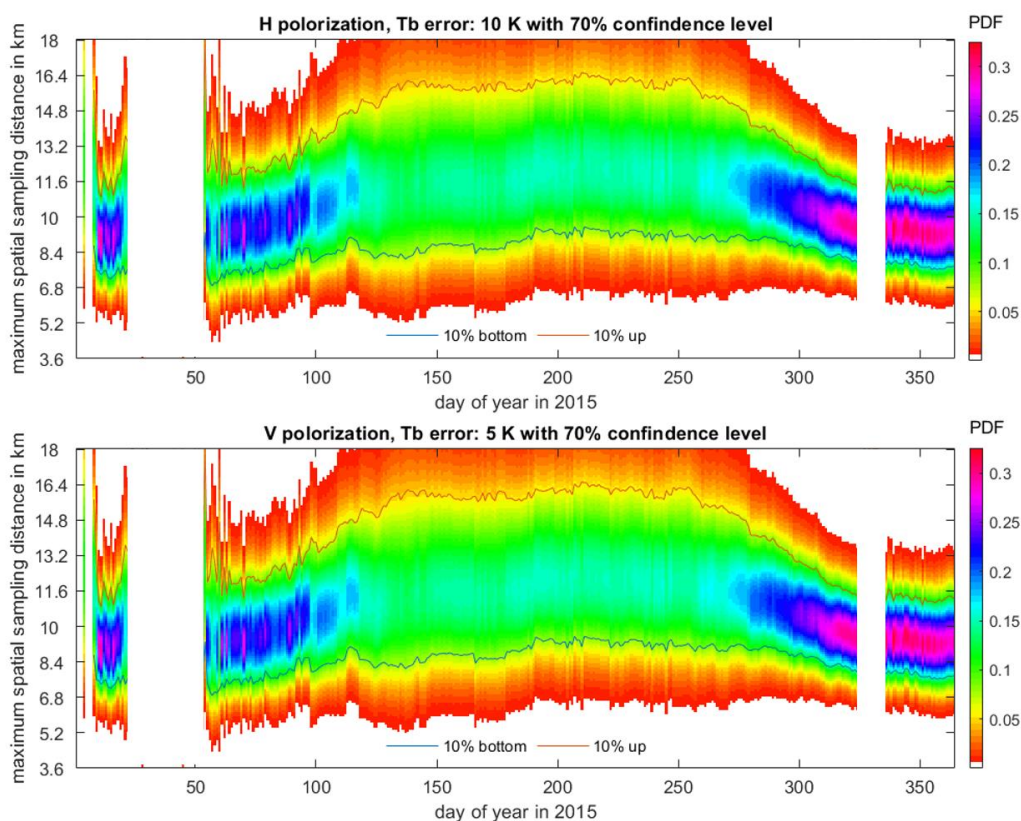

Figure 7: Time series of the distribution of maximum sampling distances (70% confidence in 10K/5K for H/V polarization) for brightness temperature at every sites in 2015. The degree of grayness indicates the probability of occurrence.

284

285 The spatial distribution of the annual average maximum sampling distance required to guarantee a  
286 sampling error below 10K/5K for H/V polarized brightness temperatures and its RMS for the year 2015  
287 (Figure 8) are similar for H and V polarizations but show different and much stronger patterns compared  
288 to the results for soil moisture (Figure 5). Similarly, the southeast corner of the model region has larger  
289 maximum sampling distances, but there are now also other distinct regions with larger minimum sampling  
290 distances. Additional input parameters required and internal parameters in CMEM now impact the  
291 representativeness of different sites - especially LAI. LAI dominates the variation of the representativeness





292 of ground-based observations and also its temporal variation, as can be inferred from the correlation  
293 between large maximum sampling distances with its variability over the year (correlation coefficient is  
294 0.84/0.83 for H/V polarization), which is not observed for soil moisture. LAI is the only input in CMEM  
295 which can lead to such a temporal variation because other inputs and internal parameters such as air  
296 temperature, soil moisture, soil properties, etc. are either fixed or do not impact on brightness  
297 temperature significantly.

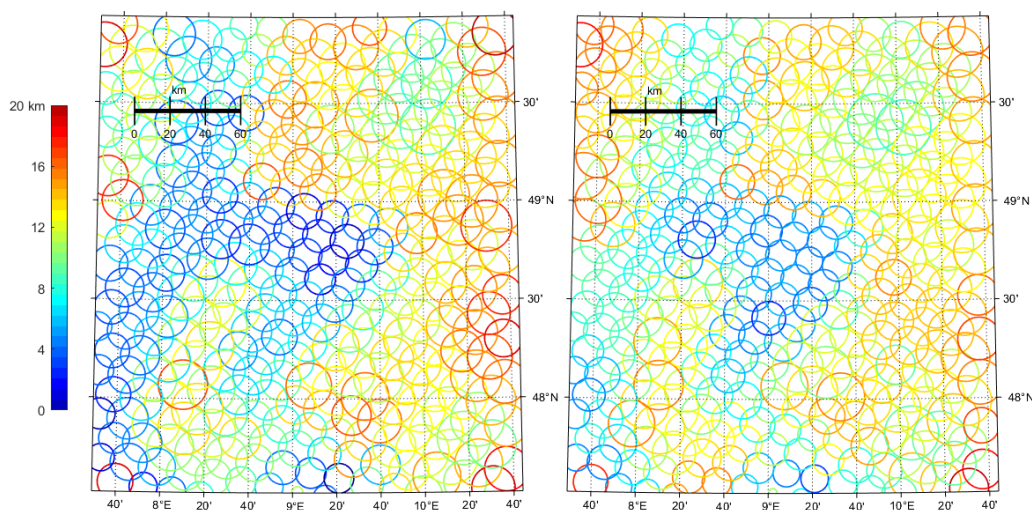

Figure 8: Spatial distribution of the surface-based brightness temperature network resolution required in the model region. The circle diameter indicates the maximum sampling distance which keeps the error below 10 K for H polarization and 5 K for V polarization in the scale shown in the map, while its color (see color bar) gives the RMS of the maximum sampling distance over time for the year 2015.

298

### 299 **3.3 Maximum sampling distance differences between soil moisture and brightness** 300 **temperature**

301 The differences in the variability of the maximum sampling distance for soil moisture and brightness  
302 temperature can be explained by using the microwave transfer model CMEM. The relationship between  
303 soil moisture and brightness temperature is complex and non-unique (Figure 9a, b). E.g., a soil moisture  
304 value of  $0.4 \text{ cm}^3/\text{cm}^3$  can relate to a wide range of brightness temperature from 180 K to 250 K for H  
305 polarization and 225 K to 265 K for V polarization due to the variation of vegetation cover, soil properties,  
306 and terrain.

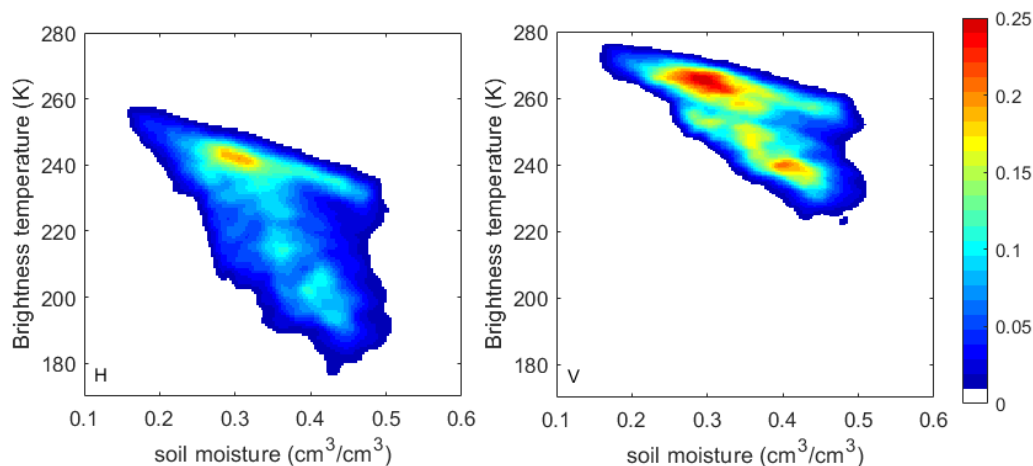

Figure 9: Scatter plots of joint PDF between brightness temperature at H and V polarization against soil moisture computed from the 400 m resolution virtual reality for one year. Both temporal and spatial variation are accounted.

307

308 The spatial resolution for the SMAP active product is 3 km and for the passive-active merged soil  
309 moisture product 9 km. SMAP CAL/VAL requires for core stations 3 stations for the evaluation of the prior  
310 and 5 stations for the latter product. We computed the average station distance for both products  
311 required to keep the sampling error below the nominal  $0.04 \text{ cm}^3/\text{cm}^3$  by using the same methodology  
312 used above. Due to limited computation capacity, not all higher-resolution footprints are used, but only  
313 those in the center of the 43-km SMOS footprints. According to the results displayed in Figure 10, the  
314 confidence level for most of the 3/9-km footprints sampled by 3/5 stations is below 50%-60% and thus  
315 lower than the required 70%. The temporal variation of the confidence level is larger for the 3 km than  
316 for the 9 km footprints.

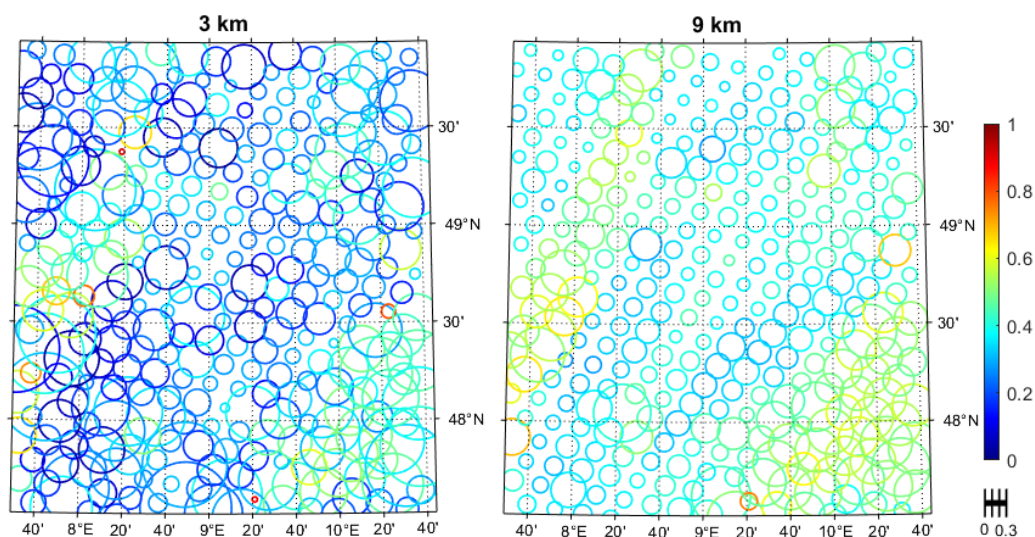

Figure 10: The spatial distribution of the soil moisture sampling confidence to achieve the  $0.04 \text{ cm}^3/\text{cm}^3$  accuracy requirement by sampling 3/9-km footprints with 3/5 sites. The colors show the minimum confidence level throughout the year 2015 for every footprint. The size of circles indicate the standard deviation of the confidence level over the time.

317

### 318 **3.4 The impact of land surface inhomogeneity**

319 Areas with vegetation water content  $> 5 \text{ kg}/\text{m}^2$  (mostly forests) are flagged in SMAP retrievals. The  
320 networks used in the studies by (Colliander et al., 2017b; Famiglietti et al., 2008) were selected based on  
321 homogeneity; thus forested patches, open water, permanent ice and snow, urban areas, wetlands are  
322 excluded. Soil moisture maps from SMAP/SMOS are, however, global. Thus estimates are provided  
323 everywhere; thus signals from open water surfaces on sub-grid scales may influence the products. We  
324 used our simulated observations to study the impact of sub-pixel contributions of forested areas on the  
325 sampling errors.

326 In total 16 of the 320 footprints in the model area have forest fractions below 15% and negligible  
327 surface water contributions; such footprints are usually considered as an ideal footprint for soil moisture  
328 Cal/Val. We compare their sampling statistics with the statistics for all footprints in Figure 11, which shows  
329 that in terms of both soil moisture and brightness temperature, the maximum sampling errors for the  
330 selected sites are considerably lower compared all sites for all sampling distances. Thus, excluding sites  
331 with forest fractions above 15% is beneficial for both soil moisture and brightness temperature  
332 evaluations.

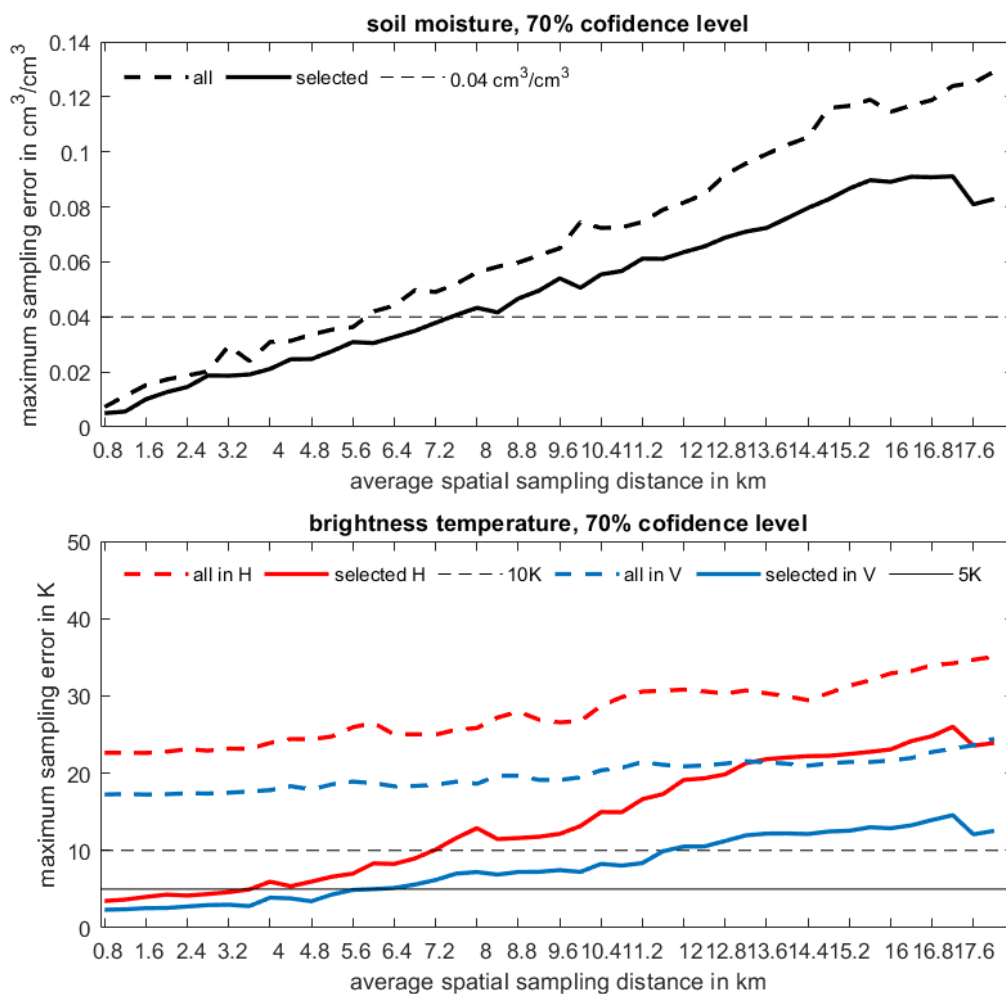

**Figure 11:** The maximum sampling errors of the arithmetic mean soil moisture/brightness temperature estimated from all sites and from sites with < 15% forest cover at given average sampling distances.

333

334 **4. Conclusion and discussion**

335 We used a virtual reality generated with the fully coupled subsurface-vegetation-atmosphere model  
 336 platform TerrSysMP over southwestern Germany with a spatial resolution of 400 m to quantify the  
 337 sampling error of mean soil moisture and brightness temperatures estimated from in-situ ground-based  
 338 observation networks covering the 43 km x 43 km SMOS/SMAP-like footprints over a wide range of  
 339 potential average sampling distances. By using a simulated virtual reality at such a high resolution, we  
 340 have a physically consistent three-dimensional evolution of the terrestrial system at our disposition, from  
 341 which we can take virtual soil moisture observations at any resolution at and above 400 m, and we can



342 simulate SMOS/SMAP-like observations taking into account the antenna function and the microwave  
343 radiative transfer model CMEM.

344 A comparison between the representativeness of ground-based soil moisture and brightness  
345 temperature observation networks reveals the complexity behind the sampling density issue. We adopted  
346 as an upper threshold for the sampling error of the estimated soil moisture and brightness temperature  
347 for SMOS/SMAP pixels the target SMOS/SMAP soil moisture retrieval accuracy of  $0.04 \text{ cm}^3/\text{cm}^3$ . We  
348 quantified the maximum sampling distance of ground-based observations required to keep the sampling  
349 error below that accuracy for all and for 70% of the SMOS/SMAP pixels over the modeling region and over  
350 one year for all network configurations possible for the specified average sampling distances.

351 The calibration and validation of L-band passive remote sensing of soil moisture is difficult due to  
352 its large variability (Lv et al., 2019; Lv et al., 2016b). Even with a perfect microwave transfer model and  
353 perfect sensors, we can hardly find a appropriate in-situ observation to compare with. While soil moisture  
354 also varies in the vertical, sensors are usually mounted at a fixed depth; thus comparisons with satellite  
355 observations require the knowledge of the microwave penetration depth, which is however unknown in  
356 general. Lv et al. (2018) developed a model based on the soil effective temperature, which sheds light on  
357 this fundamental problem. The SMAP team suggests 15 sites for a 36 km by 36 km footprint, and this study  
358 agrees with this configuration for typical midlatitude European regions. However, 5 sites for 9 km by 9 km  
359 and 3 sites for 3 km by 3 km will miss the 70 % confidence level requirements over this area.

360 It is difficult to set up an observation network, which represents the whole satellite footprint  
361 precisely. We find a maximum soil moisture sampling distance of roughly 3 km if we want to be 100% sure  
362 that the sampling error is below the nominal value of  $0.04 \text{ cm}^3/\text{cm}^3$ . If we allow for a failure probability of  
363 30 % a maximum sampling distance of 10 km is sufficient. For brightness temperatures, the sampling  
364 requirement is much stricter, because already at 800 m sampling distance, it cannot be guaranteed, that  
365 the sampling error remains below the equivalent threshold of 10K/5K for H and V-polarization,  
366 respectively, even for a 30% probability of failure.

367 While the required maximum sampling distances do not change much over the year for soil  
368 moisture - except after large-scale precipitation events which allow for larger sampling distances - its  
369 equivalent for brightness temperature has a strong seasonal variation because of the blurring effect of  
370 vegetation during the growing season when brightness temperatures become more homogeneous. The  
371 spatial distribution of the maximum sampling distances and their local variances behave quite differently  
372 between soil moisture and brightness temperature. The spatial patterns are different, and while the  
373 maximum sampling distance and its variance are strongly related for brightness temperature, they are  
374 barely related for soil moisture; this different behavior is caused by the complexity of other factors  
375 influencing microwave radiative transfer. Our study strongly suggests that the sampling density of current  
376 SMOS/SMAP ground-based Cal/Val networks should be reviewed carefully and the resulting potential



377 sampling error of estimated pixel-mean soil moisture and brightness temperatures considered in such  
378 studies. We expect this study will help to better understand the errors of satellite-derived soil moisture.

379

### 380 **Acknowledgments**

381 This research was funded by the Deutsche Forschungsgemeinschaft (DFG) via FOR2131: "Data  
382 Assimilation for Improved Characterization of Fluxes across Compartmental Interfaces", subproject P2.  
383 Compute time has been provided by the Gauss Centre for Supercomputing ([http://www.gauss-](http://www.gauss-centre.eu/gauss-centre/EN/Home/home_node.html)  
384 [centre.eu/gauss-centre/EN/Home/home\\_node.html](http://www.gauss-centre.eu/gauss-centre/EN/Home/home_node.html)) operated by the Juelich Supercomputing Centre  
385 ([http://www.fz-juelich.de/ias/jsc/EN/Home/home\\_node.html](http://www.fz-juelich.de/ias/jsc/EN/Home/home_node.html)). We thank the members of HPSC-TerrSys  
386 ([http://www.hpsc-terrsys.de/hpsc-terrsys/EN/Home/home\\_node.html](http://www.hpsc-terrsys.de/hpsc-terrsys/EN/Home/home_node.html)) and Klaus Goergen in particular  
387 for invaluable technical support with the JUQUEEN supercomputer. Furthermore, we thank Prabhakar  
388 Shrestha and Mauro Sulis from the Transregional Collaborative Research Center 32 (TR32) for their  
389 preliminary work and introduction to the TerrSysMP modeling platform.

390

### 391 **References**

- 392 Ashby, S. F., and Falgout, R. D.: A parallel multigrid preconditioned conjugate gradient algorithm for  
393 groundwater flow simulations, *Nucl Sci Eng*, 124, 145-159, 1996.
- 394 Baldauf, M., Seifert, A., Förstner, J., Majewski, D., Raschendorfer, M., and Reinhardt, T.: Operational  
395 convective-scale numerical weather prediction with the COSMO model: Description and sensitivities,  
396 *Monthly Weather Review*, 139, 3887-3905, 2011.
- 397 Brocca, L., Melone, F., Moramarco, T., and Morbidelli, R.: Spatial-temporal variability of soil moisture  
398 and its estimation across scales, *Water Resources Research*, 46, 10.1029/2009wr008016, 2010.
- 399 Brown, M. A., Torres, F., Corbella, I., and Colliander, A.: SMOS calibration, *Ieee Transactions on*  
400 *Geoscience and Remote Sensing*, 46, 646-658, Doi 10.1109/Tgrs.2007.914810, 2008.
- 401 Colliander, A., Cosh, M. H., Misra, S., Jackson, T. J., Crow, W. T., Chan, S., Bindlish, R., Chae, C., Collins, C.  
402 H., and Yueh, S. H.: Validation and scaling of soil moisture in a semi-arid environment: SMAP validation  
403 experiment 2015 (SMAPVEX15), *Remote Sensing of Environment*, 196, 101-112,  
404 10.1016/j.rse.2017.04.022, 2017a.
- 405 Colliander, A., Jackson, T. J., Bindlish, R., Chan, S., Das, N., Kim, S. B., Cosh, M. H., Dunbar, R. S., Dang, L.,  
406 Pashaian, L., Asanuma, J., Aida, K., Berg, A., Rowlandson, T., Bosch, D., Caldwell, T., Caylor, K., Goodrich,  
407 D., al Jassar, H., Lopez-Baeza, E., Martínez-Fernández, J., González-Zamora, A., Livingston, S., McNairn,  
408 H., Pacheco, A., Moghaddam, M., Montzka, C., Notarnicola, C., Niedrist, G., Pellarin, T., Prueger, J.,  
409 Pulliainen, J., Rautiainen, K., Ramos, J., Seyfried, M., Starks, P., Su, Z., Zeng, Y., van der Velde, R.,  
410 Thibeault, M., Dorigo, W., Vreugdenhil, M., Walker, J. P., Wu, X., Monerris, A., O'Neill, P. E., Entekhabi,  
411 D., Njoku, E. G., and Yueh, S.: Validation of SMAP surface soil moisture products with core validation  
412 sites, *Remote Sensing of Environment*, 191, 215-231, <https://doi.org/10.1016/j.rse.2017.01.021>, 2017b.
- 413 Coopersmith, E. J., Cosh, M. H., Bell, J. E., Kelly, V., Hall, M., Palecki, M. A., and Temimi, M.: Deploying  
414 temporary networks for upscaling of sparse network stations, *Int. J. Appl. Earth Obs. Geoinf.*, 52, 433-  
415 444, 10.1016/j.jag.2016.07.013, 2016.
- 416 Cosh, M. H., Jackson, T. J., Bindlish, R., and Prueger, J. H.: Watershed scale temporal and spatial stability  
417 of soil moisture and its role in validating satellite estimates, *Remote Sensing of Environment*, 92, 427-  
418 435, 10.1016/j.rse.2004.02.016, 2004.





- 419 Crow, W. T., Berg, A. A., Cosh, M. H., Loew, A., Mohanty, B. P., Panciera, R., de Rosnay, P., Ryu, D., and  
420 Walker, J. P.: Upscaling sparse ground-based soil moisture observations for the validation of coarse-  
421 resolution satellite soil moisture products, *Reviews of Geophysics*, 50, 20, 10.1029/2011rg000372, 2012.
- 422 de Rosnay, P., Calvet, J. C., Kerr, Y., Wigneron, J. P., Lemaitre, F., Escorihuela, M. J., Sabater, J. M., Saleh,  
423 K., Barrie, J. L., Bouhours, G., Coret, L., Cherel, G., Dedieu, G., Durbe, R., Fntz, N. E. D., Froissard, F.,  
424 Hoedjes, J., Kruszwski, A., Lavenu, F., Suquia, D., and Waldteufel, P.: SMOSREX: A long term field  
425 campaign experiment for soil moisture and land surface processes remote sensing, *Remote Sensing of  
426 Environment*, 102, 377-389, 10.1016/j.rse.2006.02.021, 2006.
- 427 Delwart, S., Bouzinac, C., Wursteisen, P., Berger, M., Drinkwater, M., Martin-Neira, M., and Kerr, Y. H.:  
428 SMOS validation and the COSMOS campaigns, *Ieee Transactions on Geoscience and Remote Sensing*, 46,  
429 695-704, 2008.
- 430 Entekhabi, D., Njoku, E. G., O'Neill, P. E., Kellogg, K. H., Crow, W. T., Edelstein, W. N., Entin, J. K.,  
431 Goodman, S. D., Jackson, T. J., Johnson, J., Kimball, J., Piepmeier, J. R., Koster, R. D., Martin, N.,  
432 McDonald, K. C., Moghaddam, M., Moran, S., Reichle, R., Shi, J. C., Spencer, M. W., Thurman, S. W.,  
433 Tsang, L., and Van Zyl, J.: The Soil Moisture Active Passive (SMAP) Mission, *P Ieee*, 98, 704-716,  
434 10.1109/jproc.2010.2043918, 2010.
- 435 Famiglietti, J. S., Ryu, D. R., Berg, A. A., Rodell, M., and Jackson, T. J.: Field observations of soil moisture  
436 variability across scales, *Water Resources Research*, 44, 10.1029/2006wr005804, 2008.
- 437 Gasper, F., Goergen, K., Shrestha, P., Sulis, M., Rihani, J., Geimer, M., and Kollet, S.: Implementation and  
438 scaling of the fully coupled Terrestrial Systems Modeling Platform (TerrSysMP v1. 0) in a massively  
439 parallel supercomputing environment—a case study on JUQUEEN (IBM Blue Gene/Q), *Geosci. Model  
440 Dev.*, 7, 2531-2543, 2014.
- 441 Jackson, T., Colliander, A., Kimball, J., Reichle, R., Crow, W., Entekhabi, D., and Neill, P.: Science data  
442 calibration and validation plan, *Jet Propuls. Lab*, 2012.
- 443 Kerr, Y. H., Waldteufel, P., Wigneron, J. P., Delwart, S., Cabot, F., Boutin, J., Escorihuela, M. J., Font, J.,  
444 Reul, N., Gruhier, C., Juglea, S. E., Drinkwater, M. R., Hahne, A., Martin-Neira, M., and Mecklenburg, S.:  
445 The SMOS Mission: New Tool for Monitoring Key Elements of the Global Water Cycle, *P Ieee*, 98, 666-  
446 687, Doi 10.1109/Jproc.2010.2043032, 2010.
- 447 Kollet, S. J., Maxwell, R. M., Woodward, C. S., Smith, S., Vanderborght, J., Vereecken, H., and Simmer, C.:  
448 Proof of concept of regional scale hydrologic simulations at hydrologic resolution utilizing massively  
449 parallel computer resources, *Water Resources Research*, 46, 2010.
- 450 Lawrence, P. J., and Chase, T. N.: Representing a new MODIS consistent land surface in the Community  
451 Land Model (CLM 3.0), *Journal of Geophysical Research: Biogeosciences*, 112, 2007.
- 452 Lemaitre, F., Poussiere, J. C., Kerr, Y. H., Dejus, M., Durbe, R., de Rosnay, P., and Calvet, J. C.: Design and  
453 test of the ground-based L-band radiometer for estimating water in soils (LEWIS), *Ieee Transactions on  
454 Geoscience and Remote Sensing*, 42, 1666-1676, 10.1109/tgrs.2004.831230, 2004.
- 455 Lv, S., Zeng, Y., Wen, J., and Su, Z.: A reappraisal of global soil effective temperature schemes, *Remote  
456 Sensing of Environment*, 183, 144-153, 10.1016/j.rse.2016.05.012, 2016a.
- 457 Lv, S., Zeng, Y., Wen, J., Zheng, D., and Su, Z.: Determination of the Optimal Mounting Depth for  
458 Calculating Effective Soil Temperature at L-Band: Maqu Case, *Remote Sensing*, 8, 476, 2016b.
- 459 Lv, S., Zeng, Y., Wen, J., Zhao, H., and Su, Z.: Estimation of Penetration Depth from Soil Effective  
460 Temperature in Microwave Radiometry, *Remote Sensing*, 10, 519, 2018.
- 461 Lv, S., Zeng, Y., Su, Z., and Wen, J.: A Closed-Form Expression of Soil Temperature Sensing Depth at L-  
462 Band, *IEEE Transactions on Geoscience and Remote Sensing*, 1-9, 10.1109/TGRS.2019.2893687, 2019.
- 463 Njoku, E. G., and Kong, J.-A.: Theory for passive microwave remote-sensing of near-surface soil-  
464 moisture, *Journal of Geophysical Research*, 82, 3108-3118, 1977.

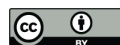

- 465 O'Neill, P., Chan, S., Njoku, E., Jackson, T., and Bindlish, R.: Soil Moisture Active Passive (SMAP),  
466 Algorithm Theoretical Basis Document Level 2 & 3 Soil Moisture (Passive) Data Products, Revision B,  
467 2015.
- 468 Ochsner, T. E., Cosh, M. H., Cuenca, R. H., Dorigo, W. A., Draper, C. S., Hagimoto, Y., Kerr, Y. H., Larson, K.  
469 M., Njoku, E. G., Small, E. E., and Zreda, M.: State of the Art in Large-Scale Soil Moisture Monitoring, *Soil*  
470 *Sci Soc Am J*, 77, 1888-1919, 10.2136/sssaj2013.03.0093, 2013.
- 471 Oleson, K., Niu, G. Y., Yang, Z. L., Lawrence, D., Thornton, P., Lawrence, P., Stöckli, R., Dickinson, R.,  
472 Bonan, G., and Levis, S.: Improvements to the Community Land Model and their impact on the  
473 hydrological cycle, *Journal of Geophysical Research: Biogeosciences*, 113, 2008.
- 474 Qin, J., Yang, K., Lu, N., Chen, Y. Y., Zhao, L., and Han, M. L.: Spatial upscaling of in-situ soil moisture  
475 measurements based on MODIS-derived apparent thermal inertia, *Remote Sensing of Environment*, 138,  
476 1-9, 10.1016/j.rse.2013.07.003, 2013.
- 477 Rosnay, P. d., Drusch, M., and Sabater, J. i. M. n.: Milestone 1 Tech Note - Part 1: SMOS Global Surface  
478 Emission Model, 2009.
- 479 Shrestha, P., Sulis, M., Masbou, M., Kollet, S., and Simmer, C.: A Scale-Consistent Terrestrial Systems  
480 Modeling Platform Based on COSMO, CLM, and ParFlow, *Monthly Weather Review*, 142, 3466-3483,  
481 10.1175/mwr-d-14-00029.1, 2014.
- 482 Sulis, M., Langensiepen, M., Shrestha, P., Schickling, A., Simmer, C., and Kollet, S. J.: Evaluating the  
483 influence of plant-specific physiological parameterizations on the partitioning of land surface energy  
484 fluxes, *Journal of Hydrometeorology*, 16, 517-533, 2015.
- 485 Tian, Y., Dickinson, R., Zhou, L., Zeng, X., Dai, Y., Myneni, R., Knyazikhin, Y., Zhang, X., Friedl, M., and Yu,  
486 H.: Comparison of seasonal and spatial variations of leaf area index and fraction of absorbed  
487 photosynthetically active radiation from Moderate Resolution Imaging Spectroradiometer (MODIS) and  
488 Common Land Model, *Journal of Geophysical Research: Atmospheres*, 109, 2004.
- 489 Ulaby, F. T., Moore, R. K., and Fung, A. K.: *Microwave Remote Sensing Active and Passive-Volume III:*  
490 *From Theory to Applications*, Artech House, Inc, 1986.
- 491 Vereecken, H., Huisman, J. A., Bogaen, H., Vanderborght, J., Vrugt, J. A., and Hopmans, J. W.: On the  
492 value of soil moisture measurements in vadose zone hydrology: A review, *Water Resources Research*,  
493 44, 10.1029/2008wr006829, 2008.
- 494 Zeng, X., Shaikh, M., Dai, Y., Dickinson, R. E., and Myneni, R.: Coupling of the common land model to the  
495 NCAR community climate model, *Journal of Climate*, 15, 1832-1854, 2002.
- 496
